# Supplementary material for: Co-expression of a cyclizing asparaginyl endopeptidase enables efficient production of cyclic peptides in planta
Source: PubMed Central journal article supplement (PMC5853369; doi:10.1093/jxb/erx422), 2017-12-22
Supplement: erx422_suppl_supplementary_figures_s1-s10.pdf [file erx422_suppl_supplementary_figures_s1-s10.pdf]

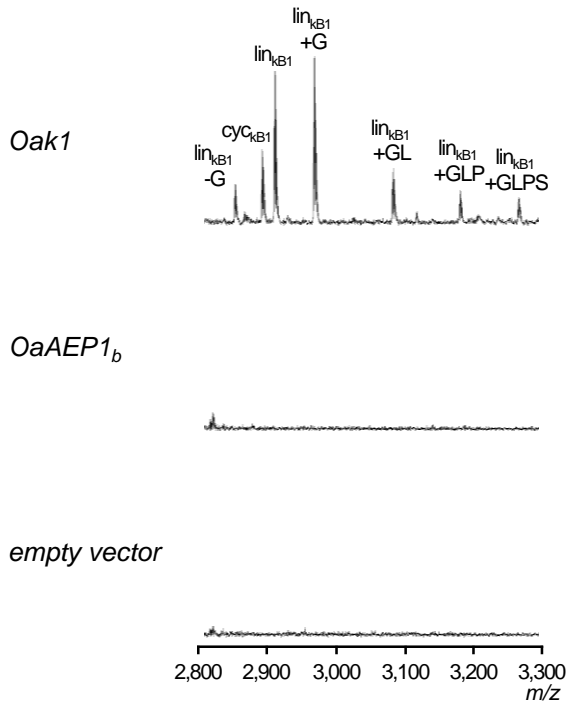

**Fig. S1.** Representative MALDI-TOF MS spectra of *Oak1* transiently expressed in *N. benthamiana* compared to transient expression of *OaAEP1<sub>b</sub>* or an empty vector. The scales for all spectra are the same; cyc, cyclic product; lin, linear product.

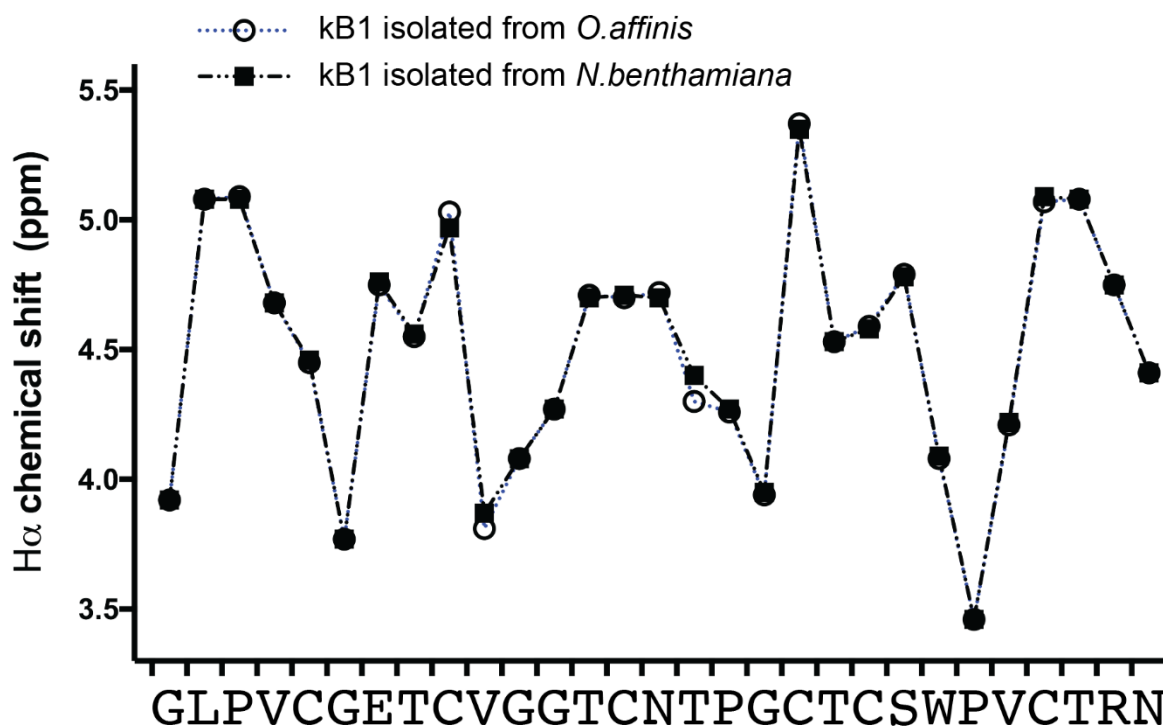

**Fig. S2.** NMR analysis of kb1 isolated from *N. benthamiana* transiently expressing *Oak1//OaAEP1<sub>b</sub>*. The H $\alpha$  chemical shift of each residue provides a sensitive probe of peptide secondary and tertiary structure. The obtained values were compared to kb1 isolated from *Oldenlandia affinis* (the native kb1-producing plant) (Rosengren *et al.*, 2003) and indicate that the molecules are identical. Minor deviations of  $\leq 0.1$  ppm are due to slight differences in the pH of the NMR samples.



A

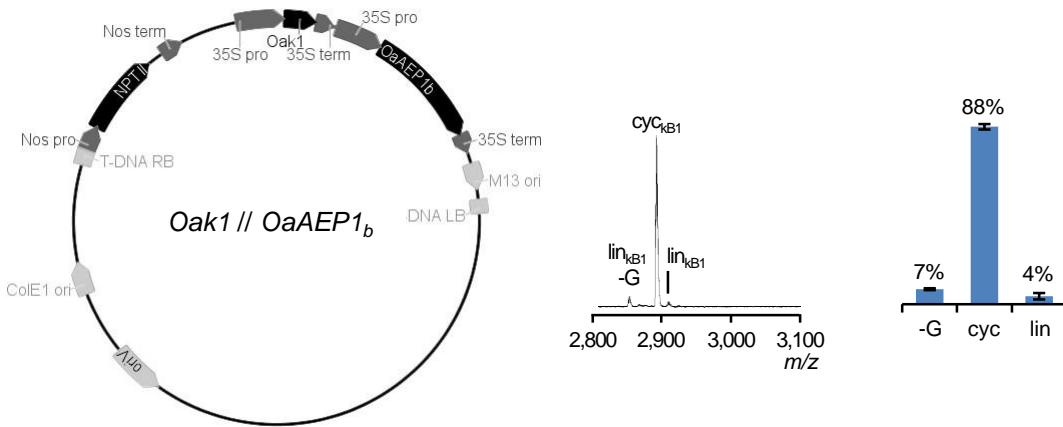

B

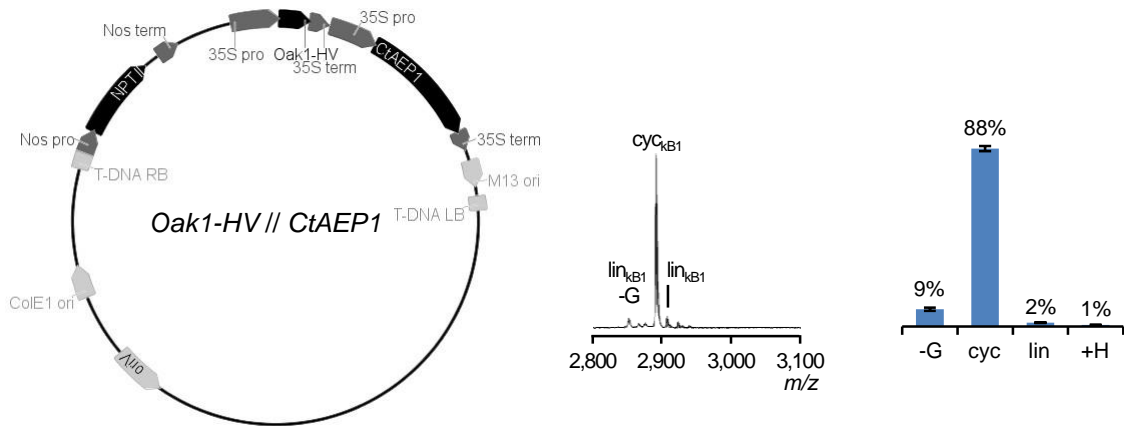

C

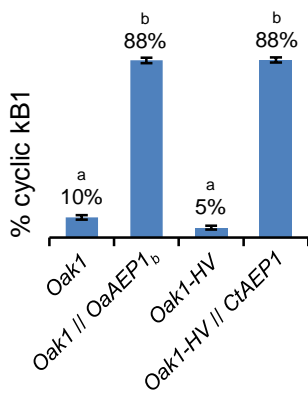

**Fig. S4.** Transient expression of double stack constructs. Plasmid maps for the (A) *Oak1//OaAEP1<sub>b</sub>* and (B) *Oak1-HV//CtAEP1* double stack constructs, representative MALDI-TOF MS spectra of these constructs transiently expressed in *N. benthamiana* and mean percentages of cyclic and linear products relative to all assigned peptides  $\pm$  SEM based on mass spectra peak areas (n=3 and 4 for (a) and (b), respectively); cyc, cyclic product; lin, linear product. (c) Mean percentage of cyclic kB1 relative to all assigned peptides for each double stack construct compared to the respective substrates alone; different letters indicate significant differences found by Tukey's ANOVA ( $p < 0.05$ ).

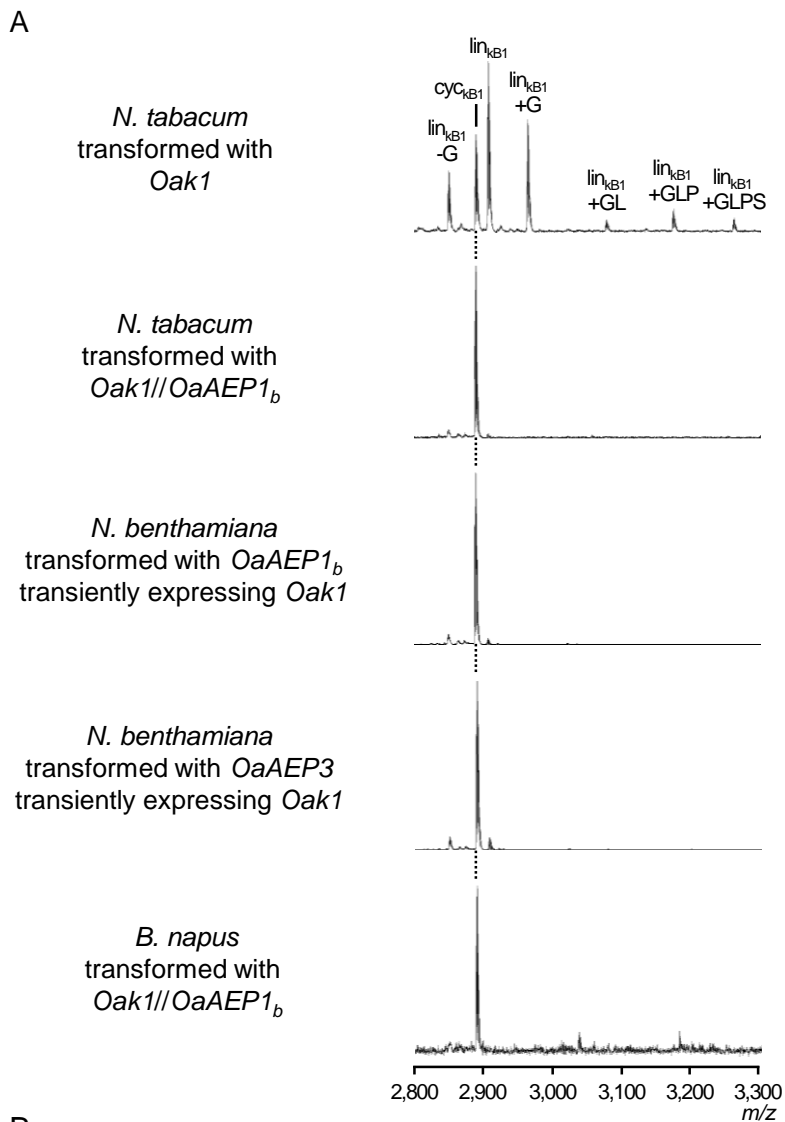

**B**

| Plant                 | Transformation                                                | No. of primary events | Percentage cyclic kB1 in primary transformants                                                     |
|-----------------------|---------------------------------------------------------------|-----------------------|----------------------------------------------------------------------------------------------------|
| <i>N. tabacum</i>     | <i>Oak1</i> (stable)                                          | 16                    | 0*, 15, 16, 17, 18, 18, 18, 18, 19, 20, 20, 20, 21, 22, 22, 26                                     |
| <i>N. tabacum</i>     | <i>Oak1//OaAEP1<sub>b</sub></i> (stable)                      | 13                    | 0*, 0*, 0*, 8, 21, 79, 83, 84, 87, 87, 89, 90, 97                                                  |
| <i>N. benthamiana</i> | <i>OaAEP1<sub>b</sub></i> (stable)<br><i>Oak1</i> (transient) | 8                     | 21, 80, 82, 84, 86, 86, 87, 89                                                                     |
| <i>N. benthamiana</i> | <i>OaAEP3</i> (stable)<br><i>Oak1</i> (transient)             | 15                    | 4, 11, 12, 32, 53, 54, 68, 70, 79, 80, 83, 84, 84, 86, 86                                          |
| <i>B. napus</i>       | <i>Oak1//OaAEP1<sub>b</sub></i> (stable)                      | 9                     | 100% cyclic kB1 detected from three events; neither cyclic nor linear kB1 detected from six events |

\*Neither cyclic nor linear kB1 were detected in these lines.

**Fig. S5.** Cyclotide production in stable transformants. (A) Representative MALDI-TOF MS spectra of peptides produced in primary *N. tabacum*, *N. benthamiana* and canola (*B. napus*) transformants. The position of cyclic kB1 is indicated with a dotted line; cyc, cyclic product; lin, linear product. (B) Percentage of cyclic kalata B1 relative to all assigned peptides based on mass spectra peak areas produced in primary *N. tabacum*, *N. benthamiana* or canola (*B. napus*) transformants.

A

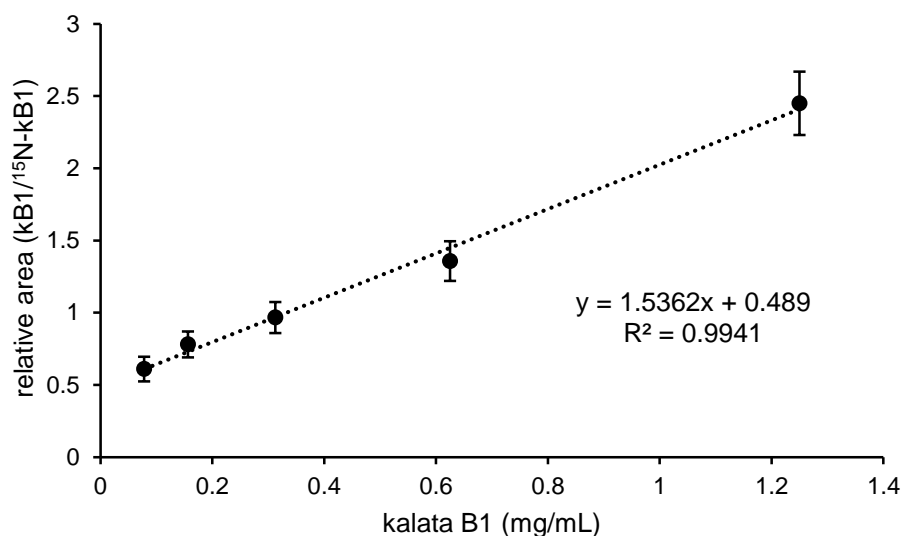

B

| Transiently expressed construct                                                     | Cyclic kB1 concentration     |                              |
|-------------------------------------------------------------------------------------|------------------------------|------------------------------|
|                                                                                     | mean $\mu\text{g g}^{-1}$ DW | mean $\mu\text{g g}^{-1}$ FW |
| pBIN19- <i>Oak1</i>                                                                 | <8.5                         | <0.8                         |
| pBIN19- <i>Oak1</i> // <i>OaAEP1<sub>b</sub></i>                                    | 75.0 $\pm$ 7.3               | 6.9 $\pm$ 0.9                |
| pBIN19- <i>Oak1</i> // <i>OaAEP1<sub>b</sub></i> + pEAQexpress- <i>GFP-HT</i> (p19) | 138.7 $\pm$ 12.8             | 20.6 $\pm$ 2.2               |
| pEAQ- <i>HT-DEST1-Oak1</i>                                                          | <10.8                        | <1.7                         |
| pEAQ- <i>HT-DEST1-Oak1</i> ( <i>N. benthamiana</i> line 7.5.5)                      | 198.8 $\pm$ 20.7             | 29.4 $\pm$ 1.7               |

**Fig. S6.** MALDI-TOF MS quantitation of cyclic kalata B1 produced in *N. benthamiana*. (A) Standard curve for kB1 concentration using the relative MALDI-TOF MS peak area of kB1 to an <sup>15</sup>N-labelled kB1 internal standard. The equation and correlation co-efficient ( $R^2$ ) are shown on the plot; each data point is the mean  $\pm$  SEM (n=4). (B) The concentration of cyclic kB1 produced in *N. benthamiana* leaves expressed as  $\mu\text{g g}^{-1}$  dry weight (DW) or  $\mu\text{g g}^{-1}$  fresh weight (FW)  $\pm$  SEM (n=3 biological replicates with each sample quantitated in triplicate). *N. benthamiana* line 7.5.5 is a single copy, homozygous line stably expressing pBIN19-*OaAEP1<sub>b</sub>*; otherwise, wild-type *N. benthamiana* was used.

A

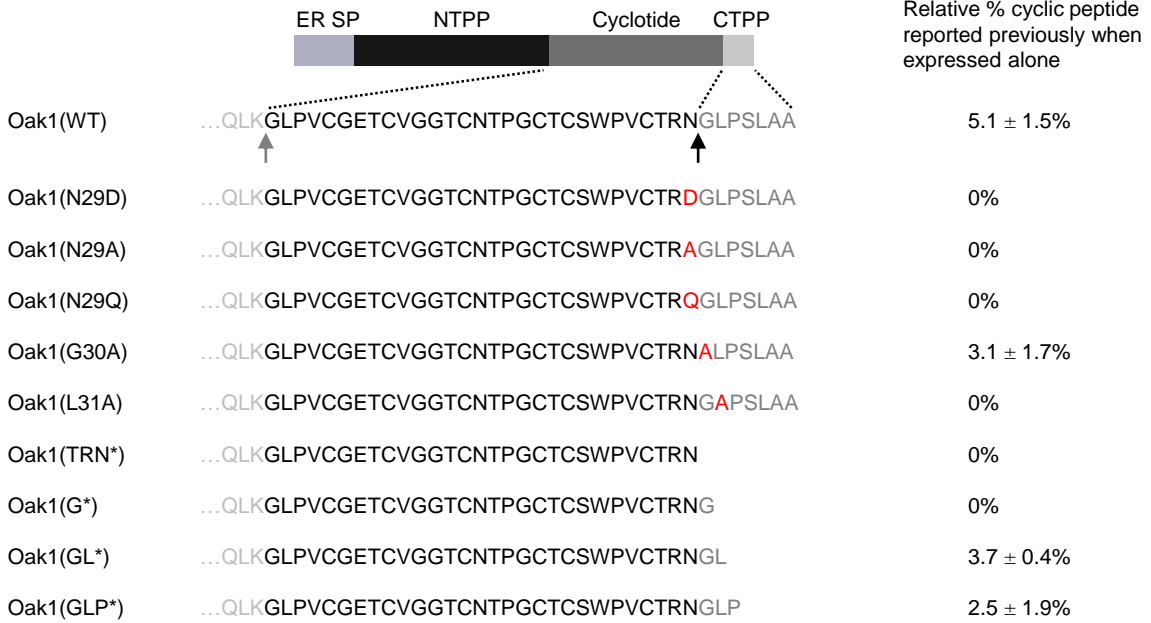

B

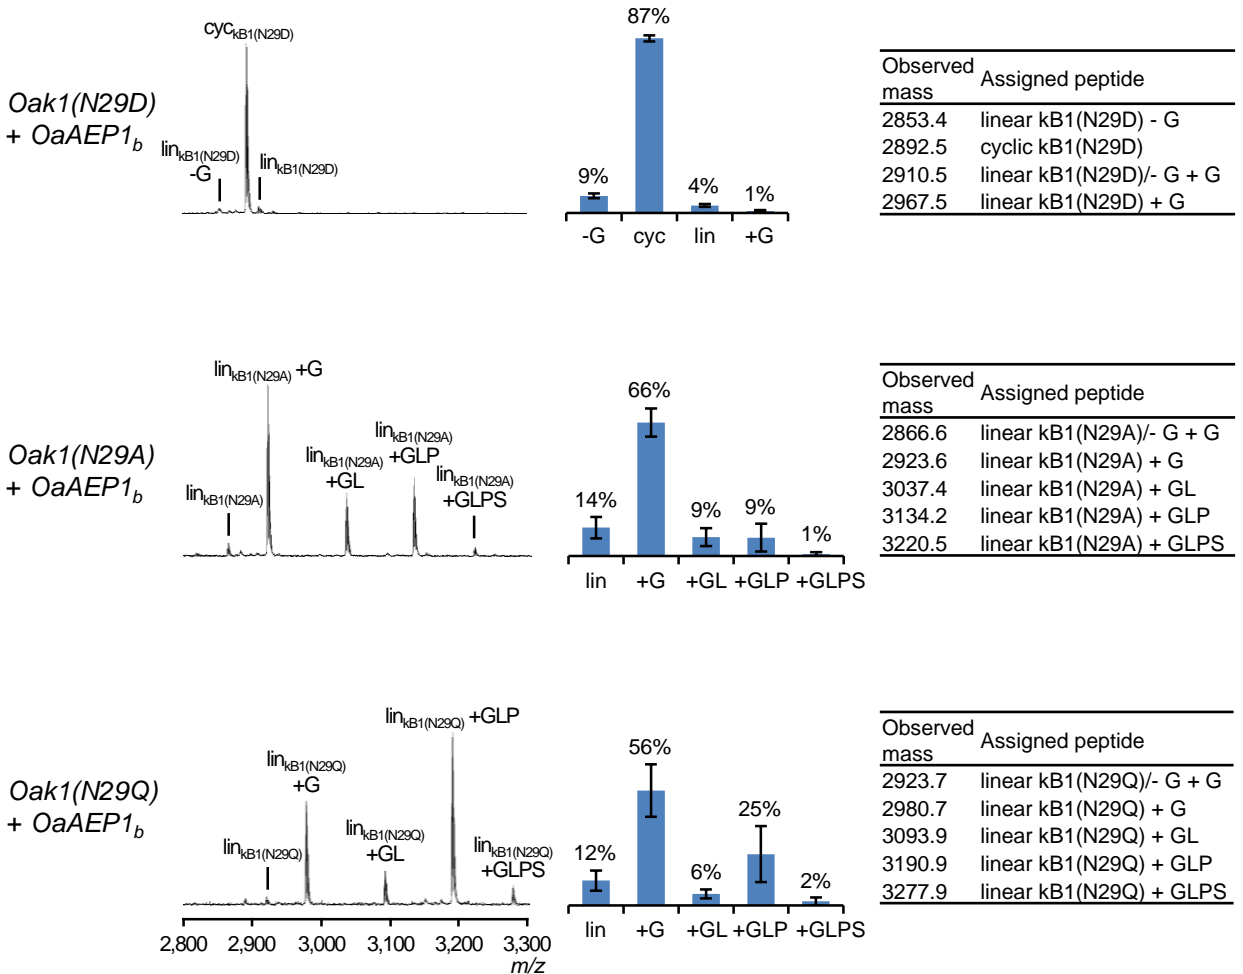

(b) (cont.)

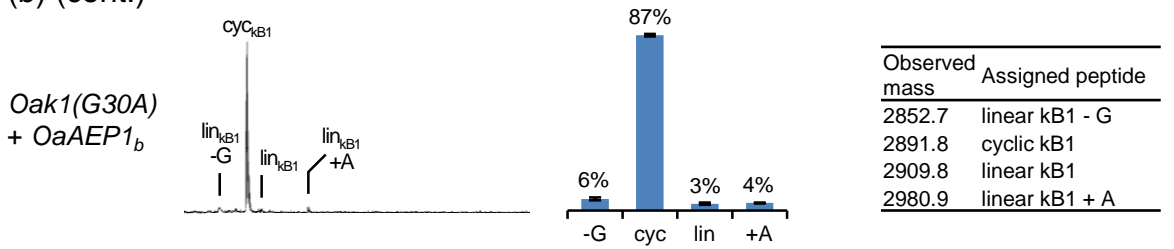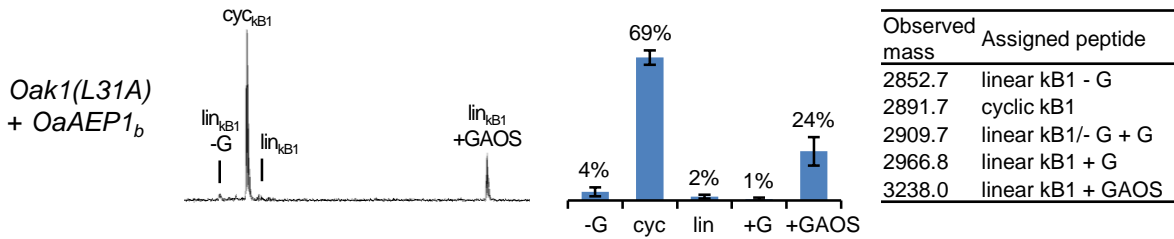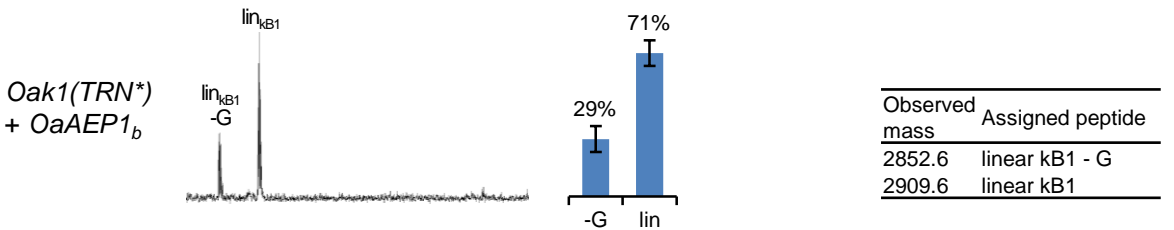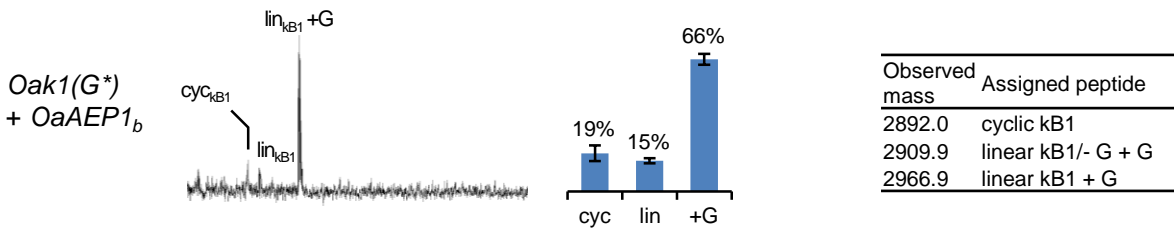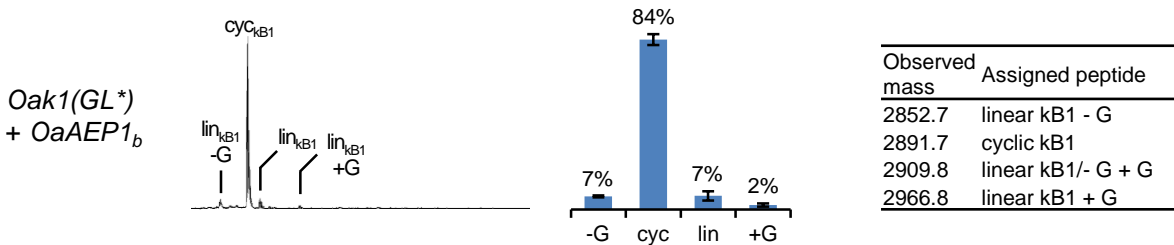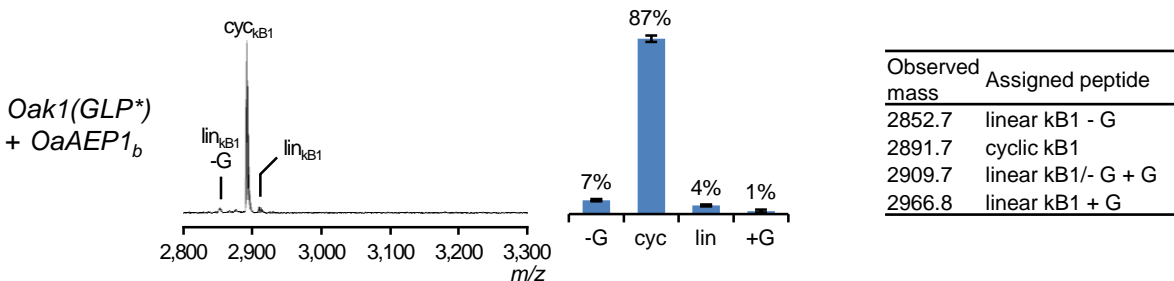



C

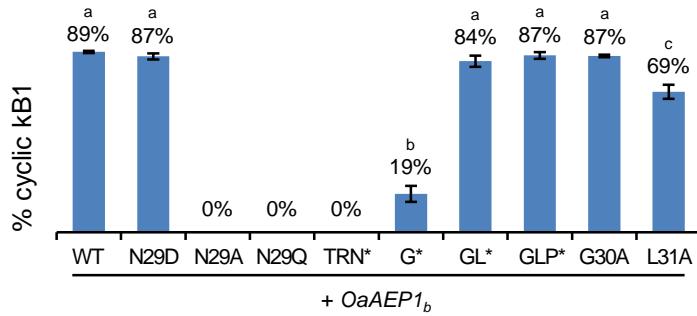

**Fig. S7.** Transient co-expression of *Oak1* variants with *OaAEP1<sub>b</sub>* in *N. benthamiana*. (A) Amino acid sequences of the cyclotide domain and CTPP of *Oak1* wild type (WT) and variants and the relative percentages of cyclic peptide reported previously when expressed alone in either *Arabidopsis*, *N. tabacum* or *N. benthamiana* (Conlan *et al.*, 2012; Gillon *et al.*, 2008). (B) Representative MALDI-TOF MS spectra, the mean percentages of cyclic and linear products relative to all assigned peptides  $\pm$  SEM based on mass spectra peak areas ( $n=3$  except for *Oak1(N29D)* ( $n=6$ ) and *Oak1(TRN\*)* ( $n=5$ )) and the observed monoisotopic masses (Da;  $[M+H]^+$ ) and assigned peptides; cyc, cyclic product; lin, linear product. (C) Comparison of the mean relative percentage of cyclic kB1 for each variant; different letters indicate significant differences found by Tukey's ANOVA ( $p < 0.05$ ).

A

Oak1

| Observed mass | Assigned peptide  |
|---------------|-------------------|
| 2852.4        | linear kB1 - G    |
| 2891.4        | cyclic kB1        |
| 2909.4        | linear kB1- G + G |
| 2966.4        | linear kB1 + G    |
| 3079.5        | linear kB1 + GL   |
| 3176.6        | linear kB1 + GLP  |
| 3262.9        | linear kB1 + GLPS |

no AEP  
n=9

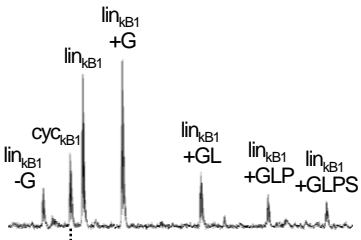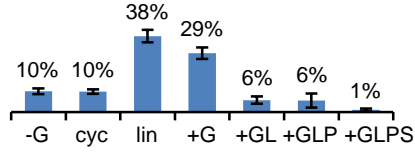

+ OaAEP1<sub>b</sub>  
n=11

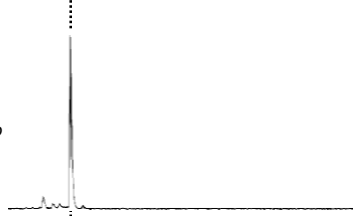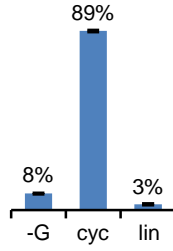

+ OaAEP2  
n=5

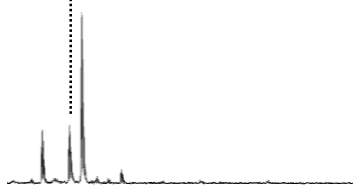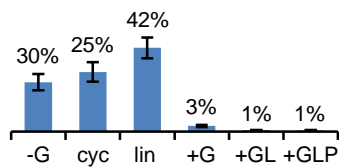

+ OaAEP3  
n=7

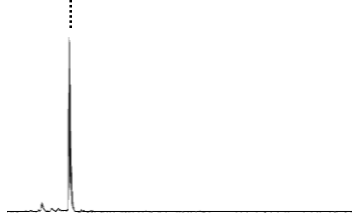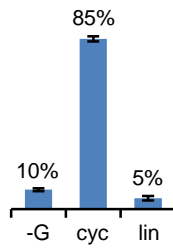

2,800 2,900 3,000 3,100 3,200 3,300  
m/z

B

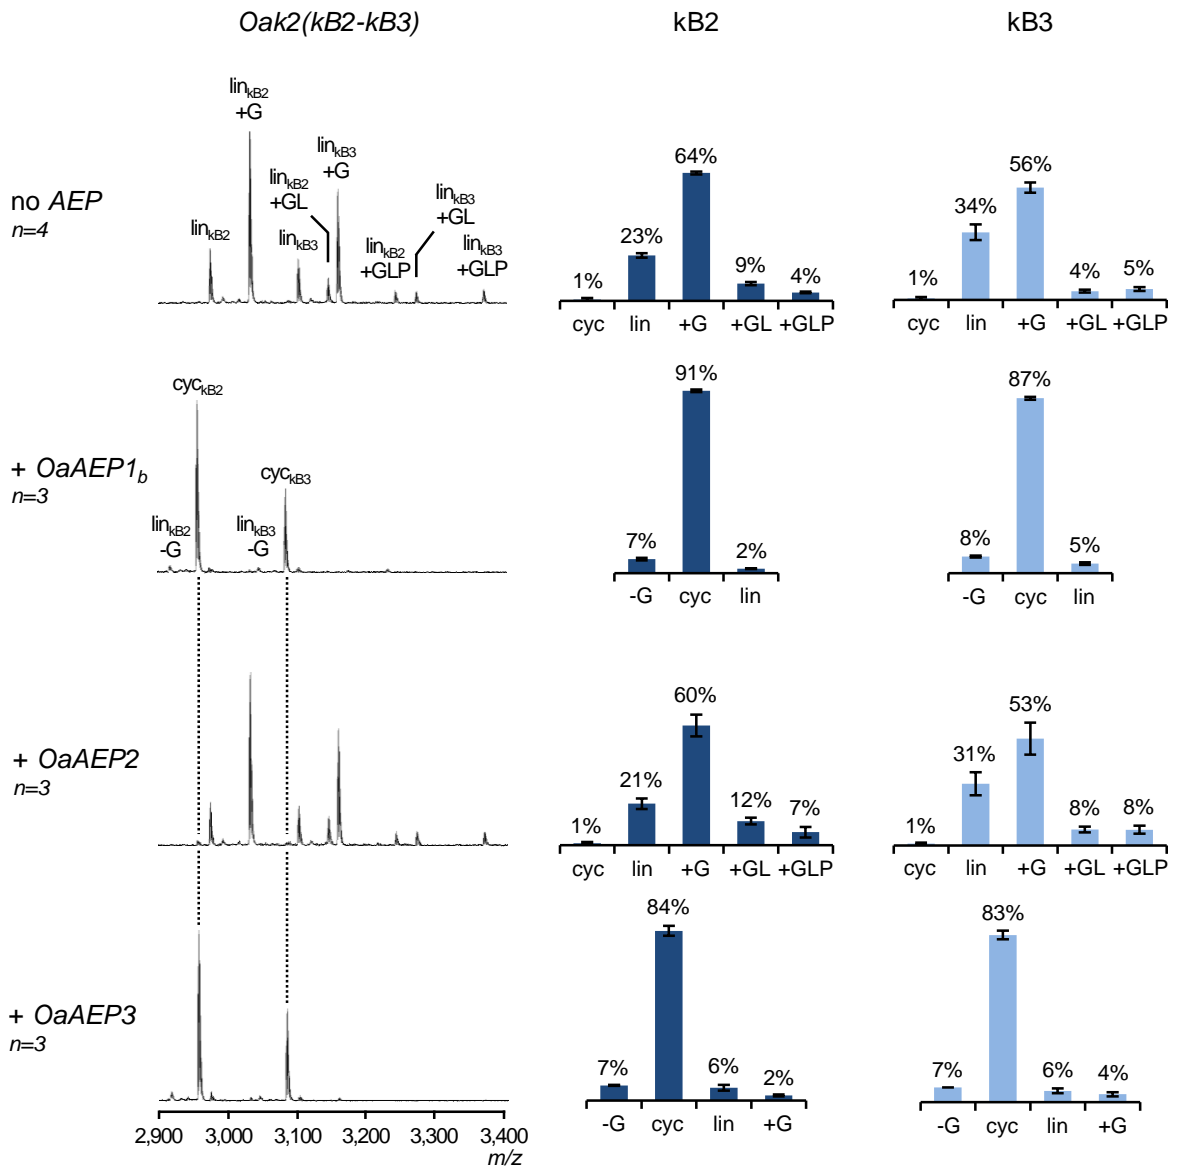

| Observed mass | Assigned peptide   |
|---------------|--------------------|
| 2915.3        | linear kB2 - G     |
| 2954.3        | cyclic kB2         |
| 2972.3        | linear kB2/- G + G |
| 3029.4        | linear kB2 + G     |
| 3142.5        | linear kB2 + GL    |
| 3239.5        | linear kB2 + GLP   |

| Observed mass | Assigned peptide   |
|---------------|--------------------|
| 3042.3        | linear kB3 - G     |
| 3081.3        | cyclic kB3         |
| 3099.4        | linear kB3/- G + G |
| 3156.4        | linear kB3 + G     |
| 3269.5        | linear kB3 + GL    |
| 3366.6        | linear kB3 + GLP   |

C

*Oak4*

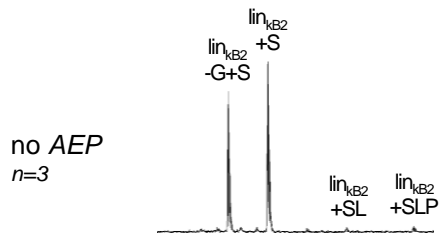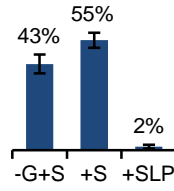

| Observed mass | Assigned peptide   |
|---------------|--------------------|
| 2915.2        | linear kB2 - G     |
| 2954.3        | cyclic kB2         |
| 2972.3        | linear kB2         |
| 3002.2        | linear kB2 - G + S |
| 3059.3        | linear kB2 + S     |
| 3172.2        | linear kB2 + SL    |
| 3269.3        | linear kB2 + SLP   |

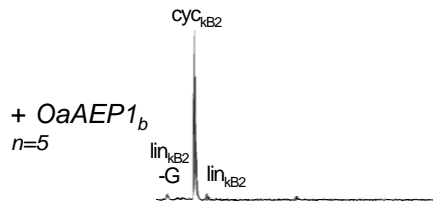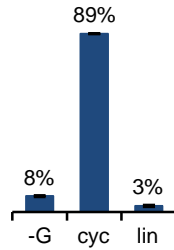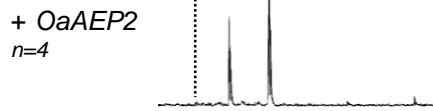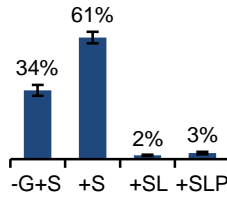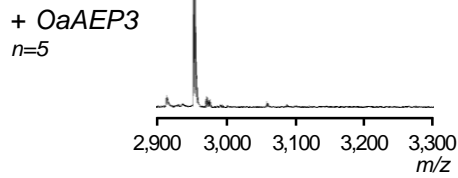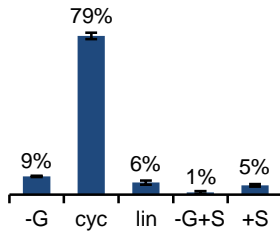

D

*Oak1-HV*

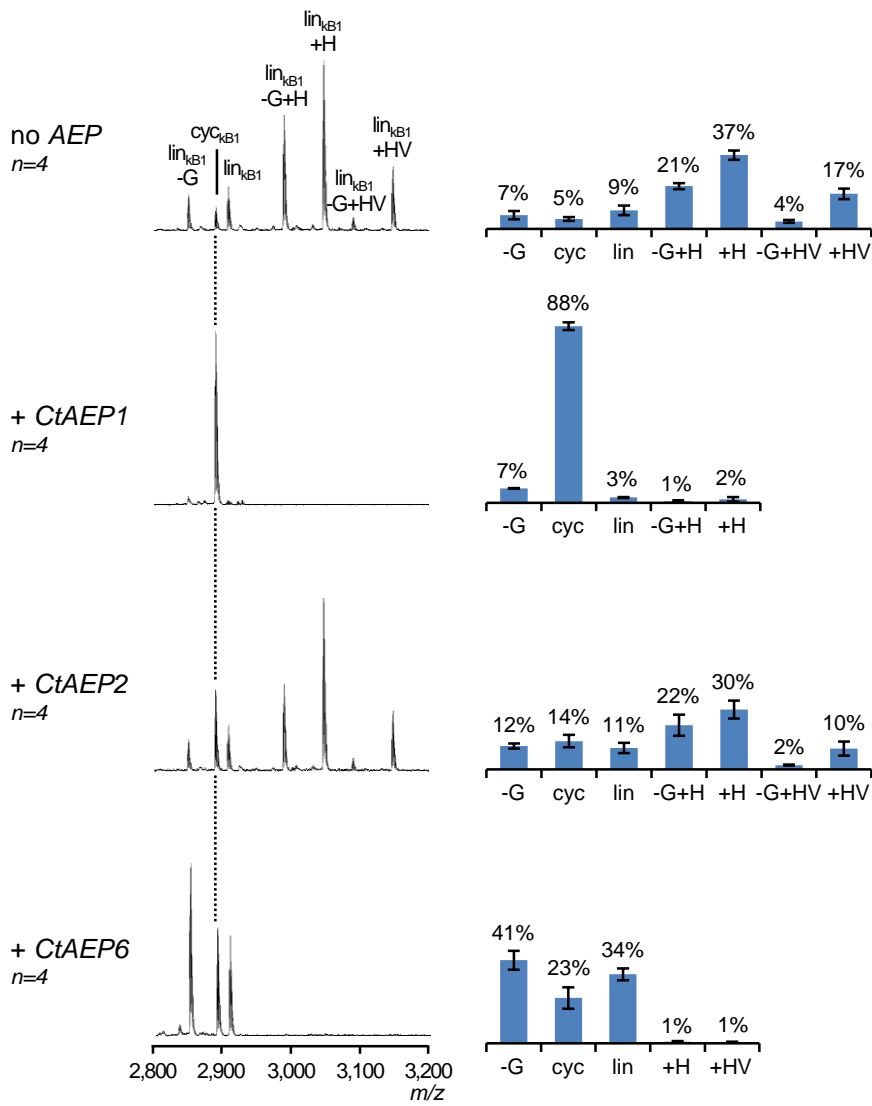

| Observed mass | Assigned peptide    |
|---------------|---------------------|
| 2852.2        | linear kB1 - G      |
| 2891.3        | cyclic kB1          |
| 2909.3        | linear kB1          |
| 2989.3        | linear kB1 - G + H  |
| 3046.3        | linear kB1 + H      |
| 3088.4        | linear kB1 - G + HV |
| 3145.4        | linear kB1 + HV     |

E

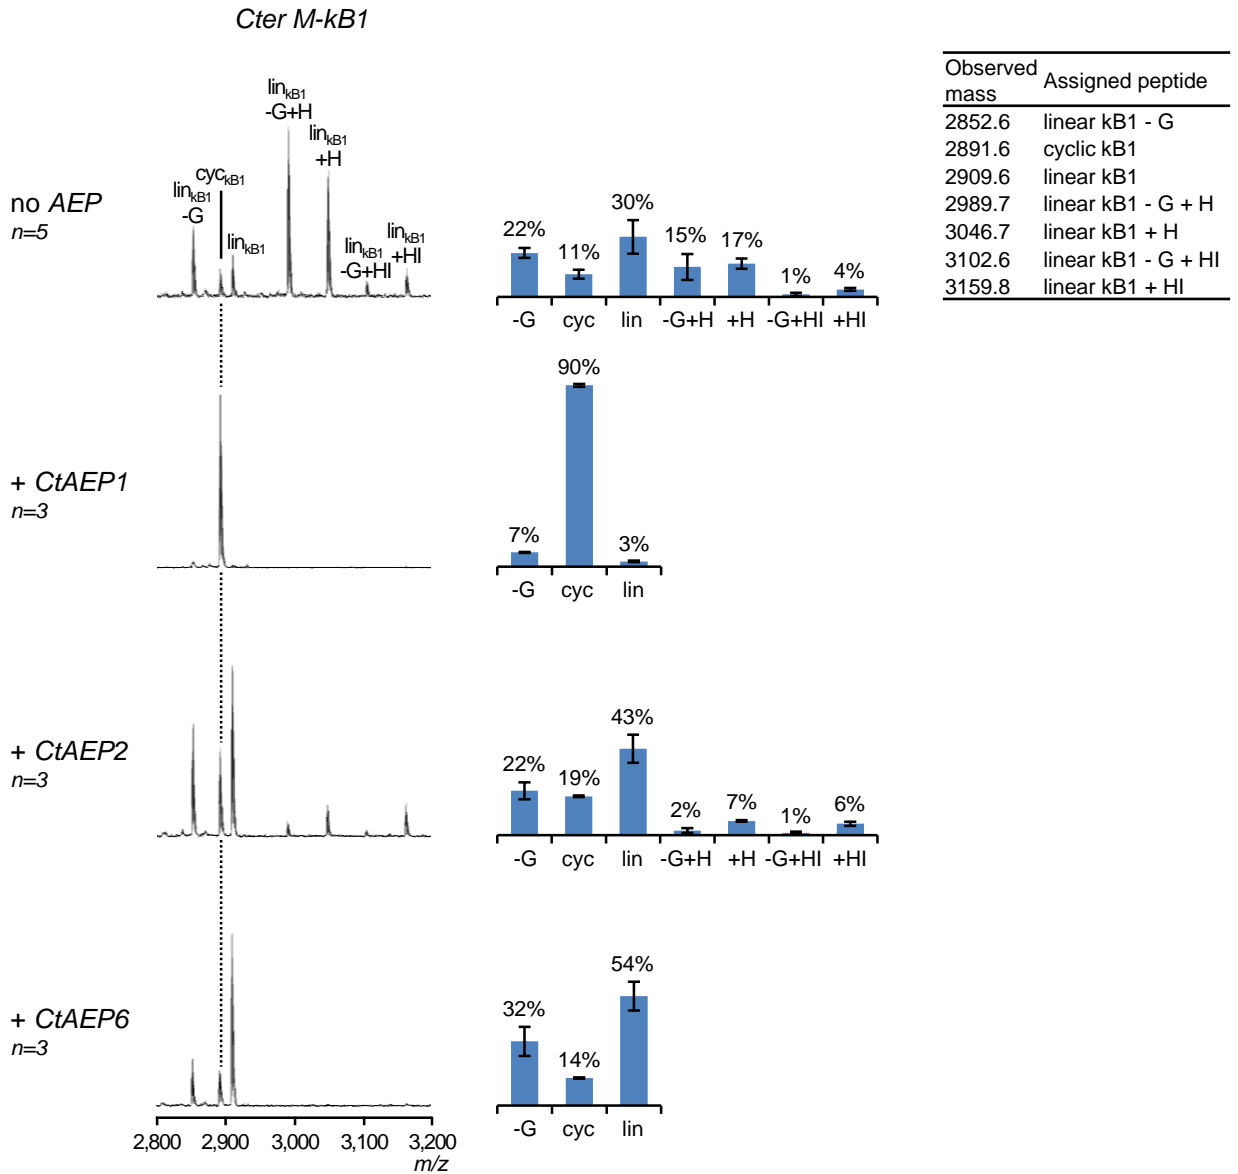

**Fig. S8.** Production of kalata B1, kalataB2 and kalata B3 by transient co-expression of the cyclotide precursors with a cyclizing AEP in *N. benthamiana*. Representative MALDI-TOF mass spectra of peptides produced by transient expression of (A) *Oak1*, (B) *Oak2(kB2-kB3)* and (C) *Oak4* alone or co-expressed with *OaAEP1<sub>b</sub>*, *OaAEP2* or *OaAEP3* and (D) *Oak1-HV* and (E) *Cter M-kB1* alone or co-expressed with *CtAEP1*, *CtAEP2* or *CtAEP6*. The position of cyclic product is indicated with a dotted line; cyc, cyclic product; lin, linear product. The bar graphs show mean percentages of cyclic and linear products relative to all assigned peptides  $\pm$  SEM based on mass spectra peak areas (*n*, number of independent replicates shown). The tables show observed monoisotopic masses (Da;  $[M+H]^+$ ) and assigned peptides.

A

*Oak1* in bush bean  
no AEP

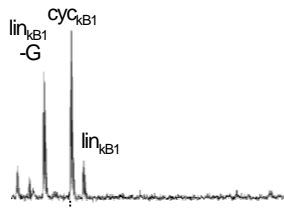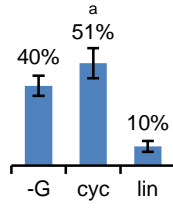

| Observed mass | Assigned peptide   |
|---------------|--------------------|
| 2852.4        | linear kB1 - G     |
| 2891.4        | cyclic kB1         |
| 2909.5        | linear kB1/- G + G |

*Oak1//OaAEP1<sub>b</sub>*  
in bush bean

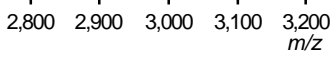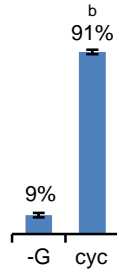

B

*Oak1-HV* in bush bean  
no AEP

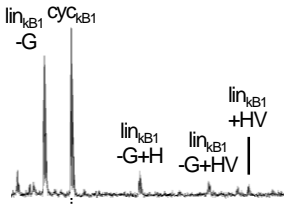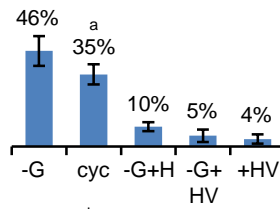

| Observed mass | Assigned peptide    |
|---------------|---------------------|
| 2852.4        | linear kB1 - G      |
| 2891.4        | cyclic kB1          |
| 2989.6        | linear kB1 - G + H  |
| 3088.8        | linear kB1 - G + HV |
| 3145.7        | linear kB1 + HV     |

*Oak1-HV//CtAEP1*  
in bush bean

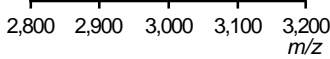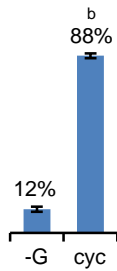

(c)

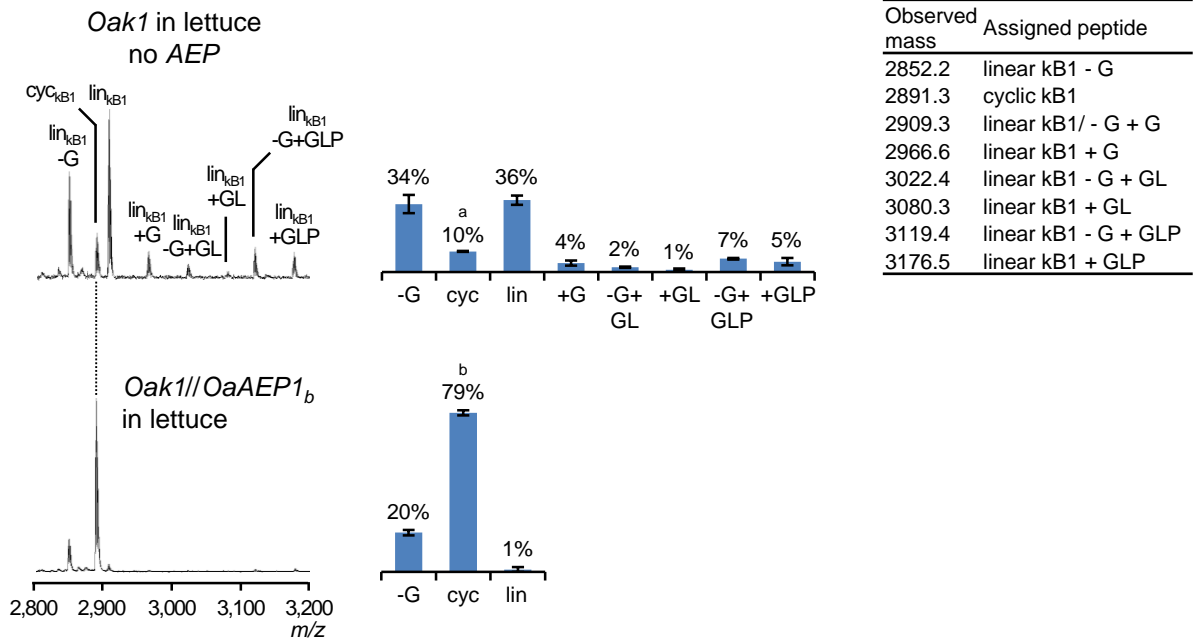

(d)

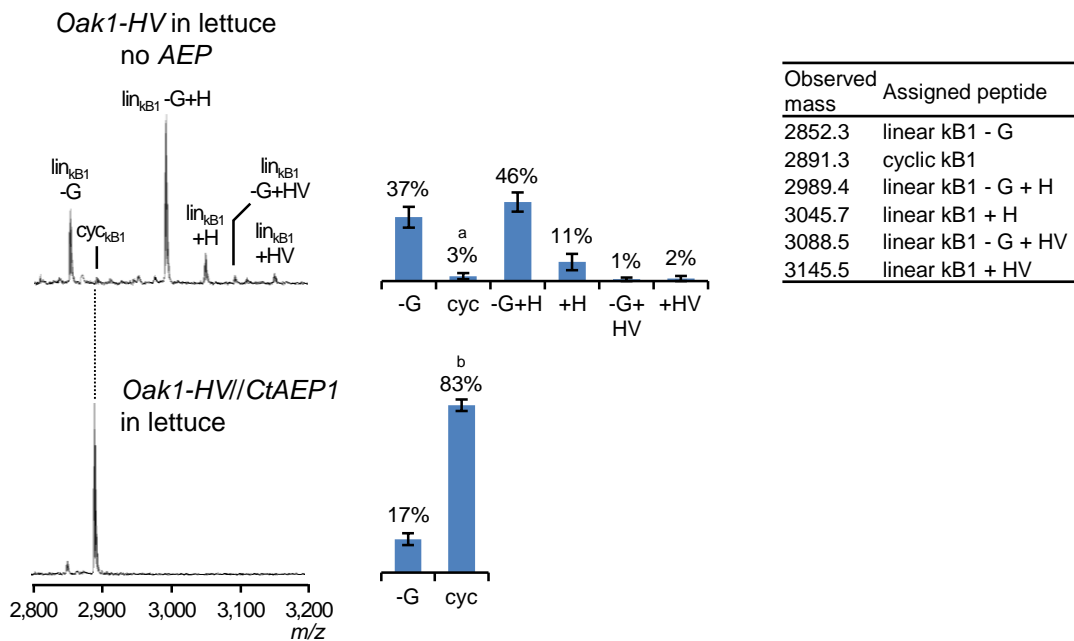

**Figure S9** Cyclotide production in bush bean and lettuce. Representative MALDI-TOF mass spectra of peptides produced by transient expression of (a, c) *Oak1* and (b, d) *Oak1-HV* either alone or in double stack constructs with *OaAEP1<sub>b</sub>* or *CtAEP1*, respectively, in bush bean and lettuce. Mean percentages of cyclic and linear products relative to all assigned peptides ± SEM based on mass spectra peak areas (n=3). Different letters indicate significant differences found by Tukey's ANOVA (p<0.05); cyc, cyclic product; lin, linear product. The tables show observed monoisotopic masses (Da; [M+H]<sup>+</sup>) and assigned peptides.



(a)

*Oak1-KNK-kB1*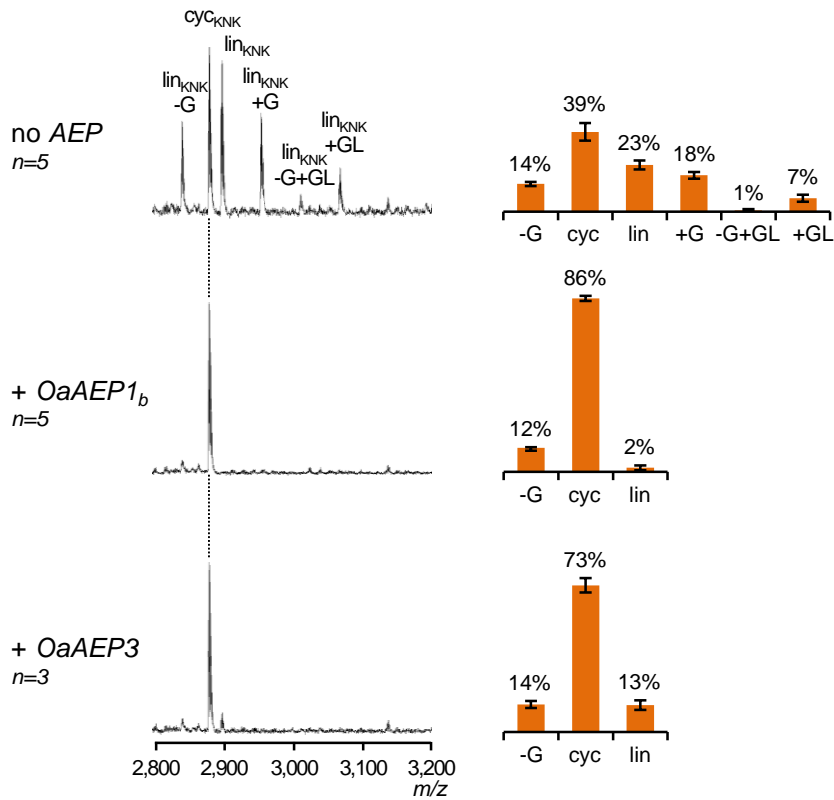

| Observed mass | Assigned peptide        |
|---------------|-------------------------|
| 2840.1        | linear KNK-kB1 - G      |
| 2879.2        | cyclic KNK-kB1          |
| 2897.1        | linear KNK-kB1/- G + G  |
| 2954.2        | linear KNK-kB1 + G      |
| 3010.5        | linear KNK-kB1 - G + GL |
| 3067.4        | linear KNK-kB1 + GL     |

(b)

*Oak1-DK-kB1*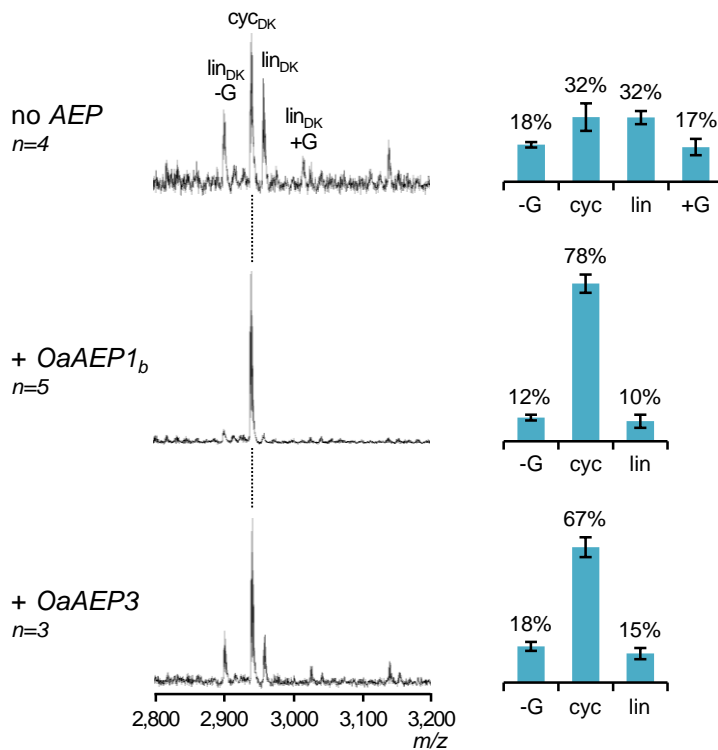

| Observed mass | Assigned peptide      |
|---------------|-----------------------|
| 2899.0        | linear DK-kB1 - G     |
| 2938.0        | cyclic DK-kB1         |
| 2956.0        | linear DK-kB1/- G + G |
| 3013.0        | linear DK-kB1 + G     |

C

*Oak1-MOG3*

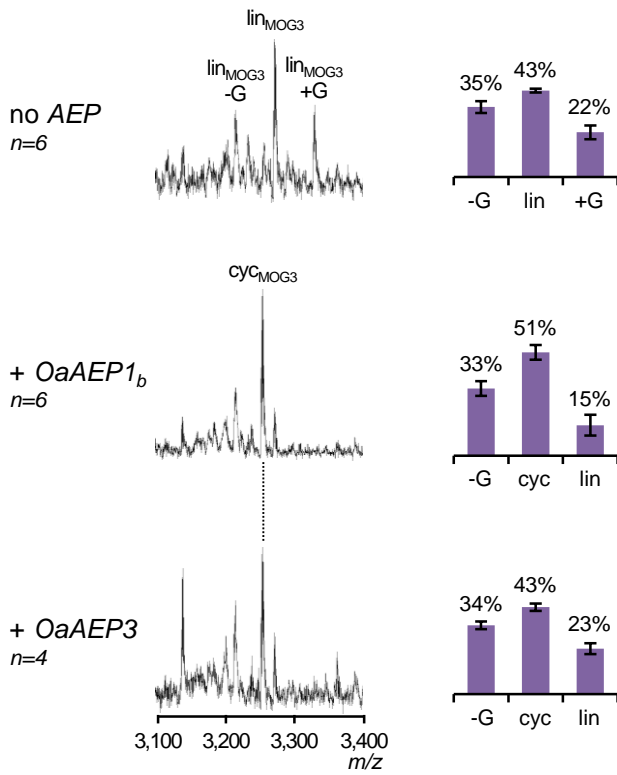

| Observed mass | Assigned peptide    |
|---------------|---------------------|
| 3212.2        | linear MOG3 - G     |
| 3251.1        | cyclic MOG3         |
| 3269.2        | linear MOG3/- G + G |
| 3326.1        | linear MOG3 + G     |

D

*Oak1-kB1(T20K)*

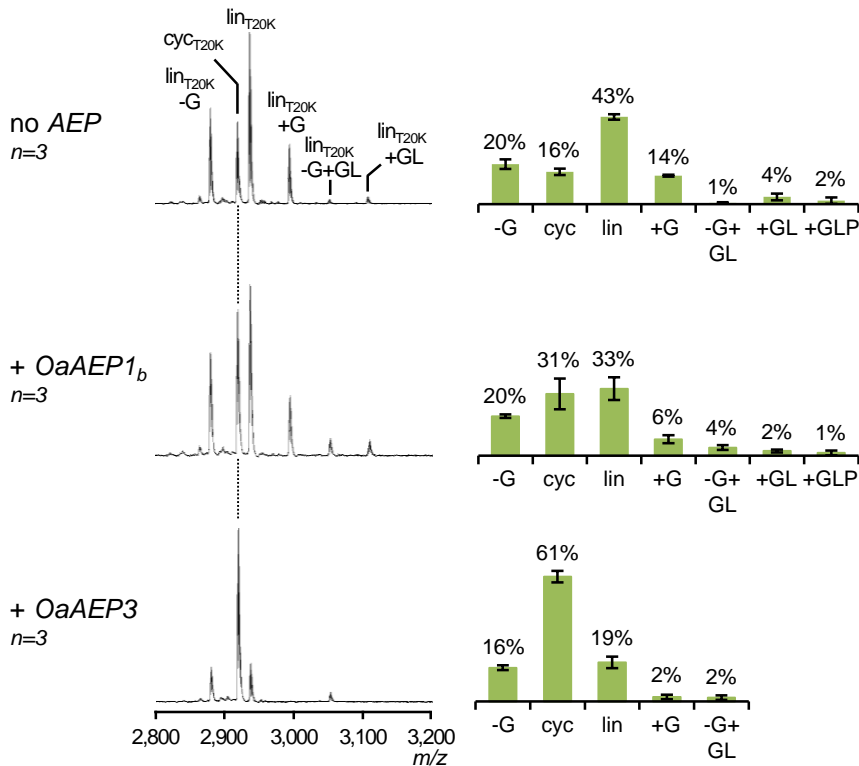

| Observed mass | Assigned peptide          |
|---------------|---------------------------|
| 2879.3        | linear kB1(T20K) - G      |
| 2918.3        | cyclic kB1(T20K)          |
| 2936.3        | linear kB1(T20K)/- G + G  |
| 2993.4        | linear kB1(T20K) + G      |
| 3050.9        | linear kB1(T20K) - G + GL |
| 3106.4        | linear kB1(T20K) + GL     |
| 3203.5        | linear kB1(T20K) + GLP    |

E

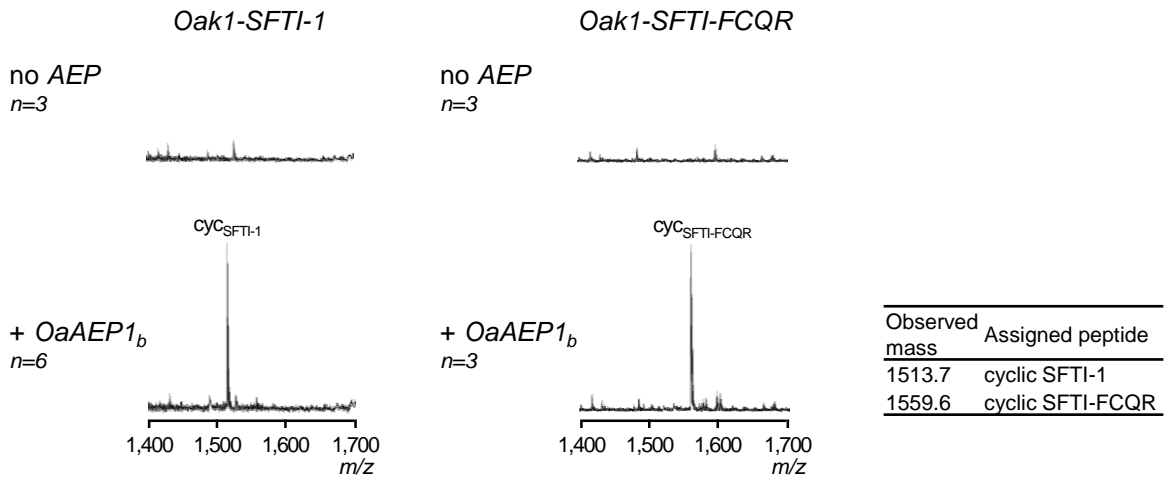

F

**KNK-kB1**

ggacttccagtatgcggtgagacttgtgttggggaacttgcaacactccaggctgcacttgcctccagaataagtgacacgcaat  
 G L P V C G E T C V G G T C N T P G C T C S K N K C T R N

**DK-kB1**

ggacttccagtatgcggtgagacttgtgttggggaacttgcaacactccaggctgcacttgcctctgggataagtgacacgcaat  
 G L P V C G E T C V G G T C N T P G C T C S W D K C T R N

**MOG3**

ggacttccagtatgcggtgagacttgtgttggggaacttgcaacactccaggctgcacttgcagatctccattttctagagtttgacacgcaat  
 G L P V C G E T C V G G T C N T P G C T C R S P F S R V C T R N

**kB1 (T20K)**

ggacttccagtatgcggtgagacttgtgttggggaacttgcaacactccaggctgcagtgctcctggcctgtttgcacacgcaat  
 G L P V C G E T C V G G T C N T P G C K C S W P V C T R N

**Oak1-SFTI-1** (codon-optimized for expression in *N. tabacum*)

atggctaagtctactgtgtgtcttttattgtgtttattattggctgcttttggttggtgcttttggttcagagttatcagattctcacaagactacactc  
 M A K F T V C L L L C L L L A A F V G A F G S E L S D S H K T T L  
 gttaatgagattgctgagaagatgctccaaagaaaaatccttagatggagtggaagctacccttgttactgatgtggcagagaagatgttttgaggaag  
 V N E I A E K M L Q R K I L D G V E A T L V T D V A E K M F L R K  
 atgaaagctgaagcaaaaacatctgagaccgagatcaggttttcttgaagcaacttcagttgaaaggtagatgccaagctattcctcctatttgt  
 M K A E A K T S E T A D Q V F L K Q L Q L K G R C T K S I P P I C  
 ttcctgatggattaccttcttagcagcataa  
 F P D G L P S L A A -

**Oak1-SFTI-FCQR:** ttttgccagagg replaces agatgccaag in Oak1-SFTI-1  
 F C Q R R C T K

**Fig. S10.** Production of grafted cyclic peptides in *N. benthamiana*. Representative MALDI-TOF mass spectra of peptides produced by transient expression of (A-D) the *Oak1* precursors for the grafted kalata B1 molecules, KNK-kB1, DK-kB1, MOG3 and kB1(T20K) either alone or co-expressed with *OaAEP1<sub>b</sub>* or *OaAEP3* and (E) the *Oak1* precursor where the kalata B1 cyclotide domain has been replaced with the mature SFTI-1 domain or the SFTI-1 domain containing the FCQR graft expressed alone or co-expressed with *OaAEP1<sub>b</sub>*. The scales for the *Oak1-SFTI-1/SFTI-FCQR* ± *OaAEP1<sub>b</sub>* spectra are the same. The position of cyclic product is indicated with a dotted line; cyc, cyclic product; lin, linear product. The bar graphs show mean percentages of cyclic and linear products relative to all assigned peptides ± SEM based on mass spectra peak areas (n, number of independent replicates shown). The tables show observed monoisotopic masses (Da; [M+H]<sup>+</sup>) and assigned peptides. (F) DNA and amino acid sequences of grafted cyclic peptides. The grafted kB1 sequences were expressed from within the *Oak1* precursor.
